# Supplementary material for: A tracer study for the development of in-water monitoring, reporting, and verification (MRV) of ship-based ocean alkalinity enhancement
Source: Copernicus journal article supplement (doi:10.5194/egusphere-2025-1348), 2025-04-08
Supplement: Supplementary file 1 [file LOC01 Synthesis Supplemental Info Submit.docx]

**Supplemental Information for:**

**A tracer study for the development of in-water monitoring, reporting, and verification of ship-based ocean alkalinity enhancement**

**Figure S1:** CTD sensor downcast data, taken in “in patch” stationsthroughout the monitoring period. Temperature (**a**), potential density (**b**), pH (**c**), rhodamine water tracer (RT) fluorescence (**d**), chlorophyll-*a* fluorescence (**e**), and dissolved oxygen (**f**).

**Figure S2:** CTD bottle data, taken at the first four in-patch and out-of-patch stations. Total alkalinity (TA) (**a**), DIC (**b**), δ13C-DIC (**c**), Nitrate+Nitrite (**d**), particulate inorganic carbon (PIC) (**e**), and particulate organic carbon (POC) (**f**).


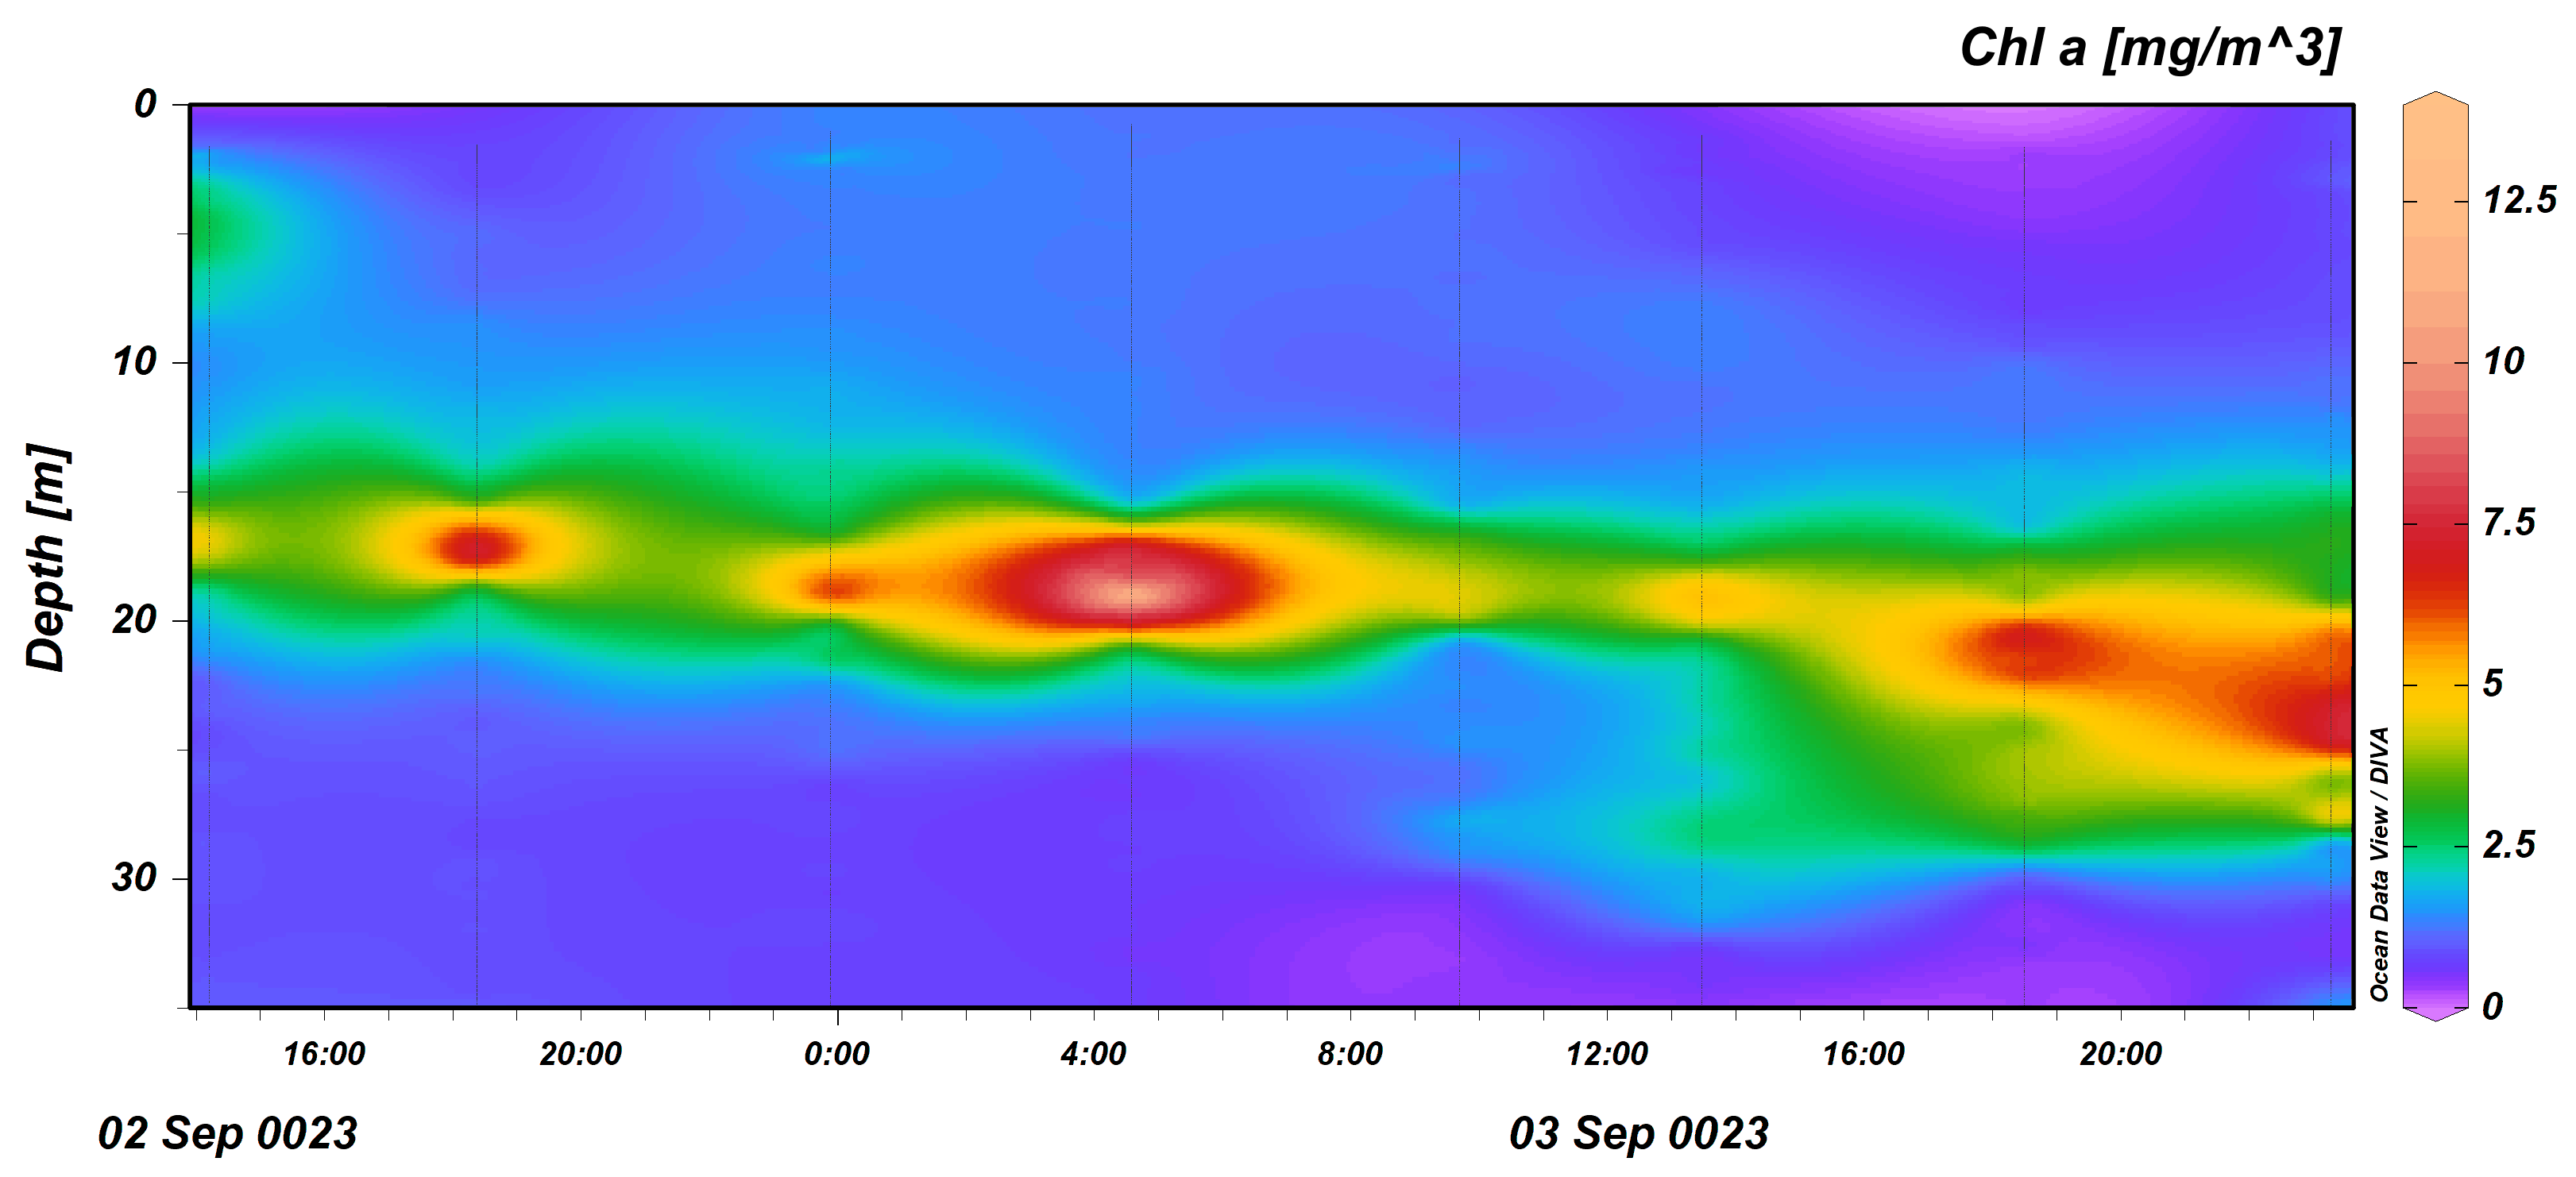


**Figure S3:** Section of Chl-*a* over time for the 9 CTDs taken inside the patch.


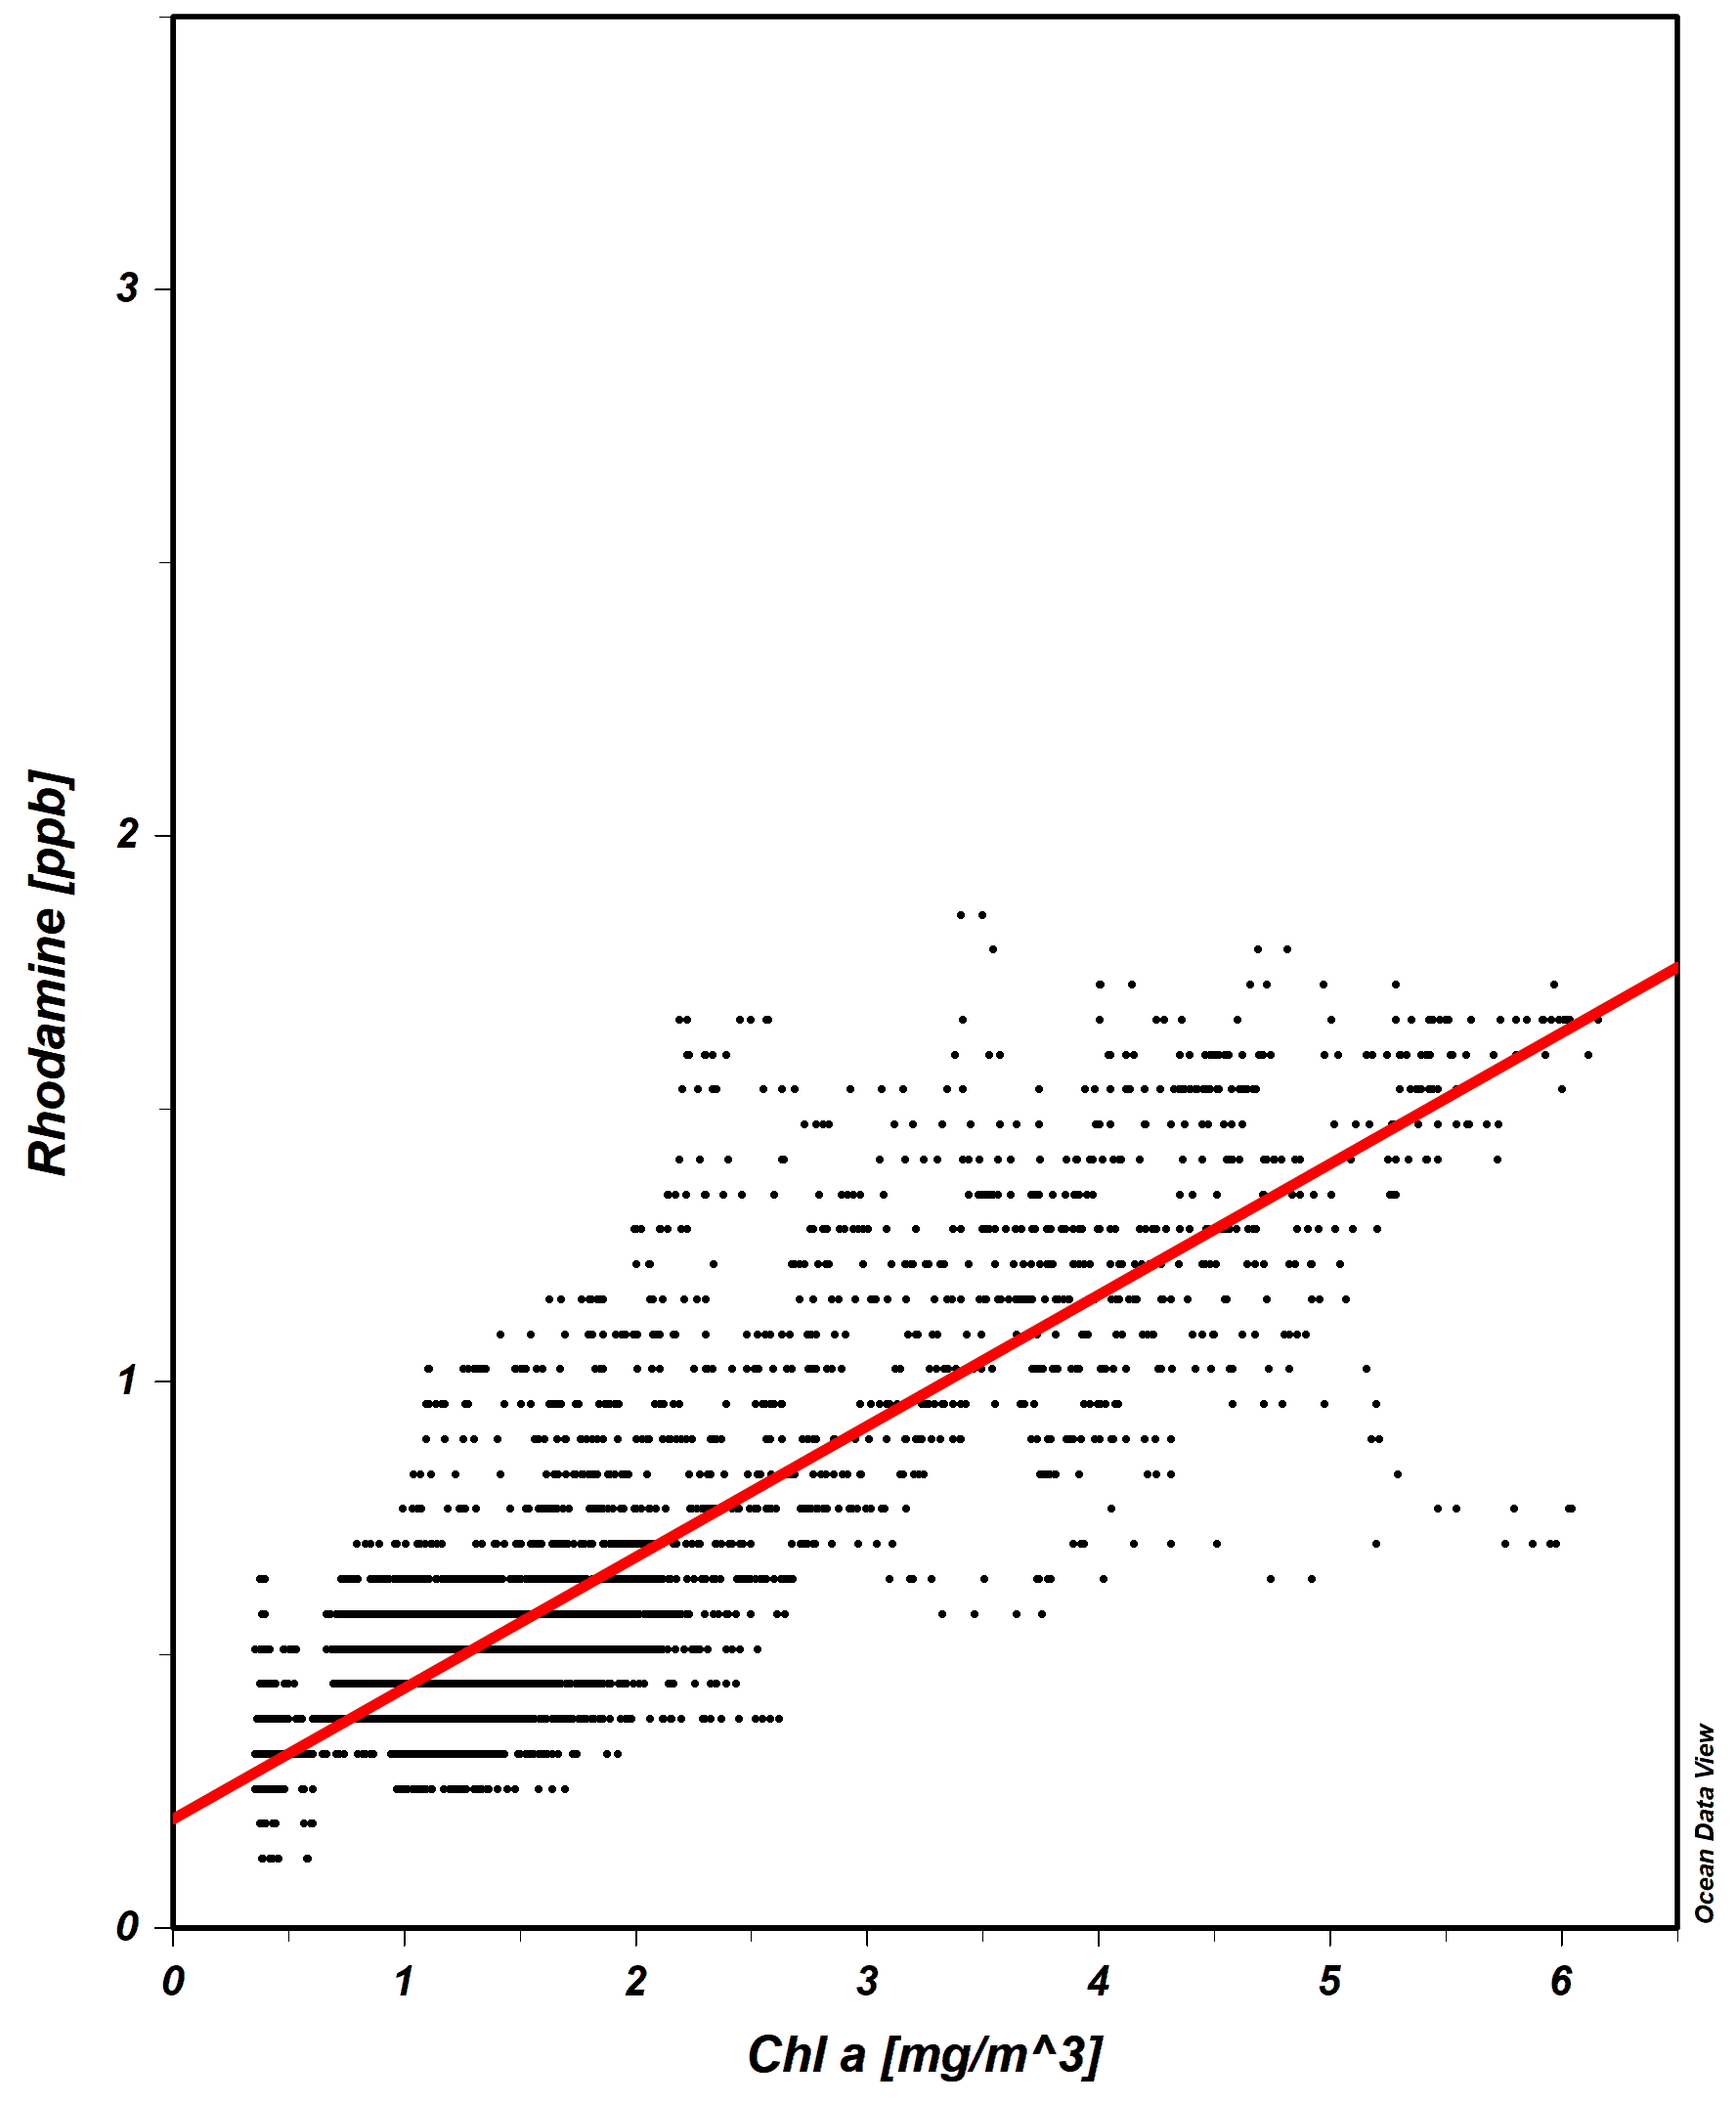


**Figure S4:** Correlation between Chl-*a* and rhodamine fluorescence. The regression shows all data in the out-of-patch stations, with the relationship rhodamine (ppb) = m*(Chl-*a* (mg m-3)) + b, with m = 0.24±0.01 ppm mg-1m3 and b = 0.20±0.02 ppb.
